# Supplementary material
Source: PubMed Central journal article supplement (PMC4542224)
Supplement: AEM.01360-15_zam999116572so1.pdf [file AEM.01360-15_zam999116572so1.pdf]

## SUPPLEMENTARY INFORMATION

**Table S1. Quantities of cytokines/chemokines measured in colonic tissues.**

| Cytokine/chemokine <sup>a</sup><br>(sample numbers) | PBS+water<br>(12) <sup>b</sup> | PBS+DSS<br>(9)        | BL23+PBS+DSS<br>(9) | BL23+milk+DSS<br>(9) | BL580+DSS (7)         | BL180+DSS (9)         | milk (9)              |
|-----------------------------------------------------|--------------------------------|-----------------------|---------------------|----------------------|-----------------------|-----------------------|-----------------------|
| IL-1 $\alpha$                                       | 588 $\pm$ 127 <sup>c</sup>     | 1014 $\pm$ 185        | 375 $\pm$ 103       | 1284 $\pm$ 506       | 1518 $\pm$ 436        | 1039 $\pm$ 188        | 932 $\pm$ 171         |
| IL-1 $\beta$                                        | 1174 $\pm$<br>414              | 5231 $\pm$ 1192       | 4932 $\pm$ 894      | 5733 $\pm$ 1657      | 8631 $\pm$ 3212       | 10530 $\pm$ 2103      | 9207 $\pm$ 1951       |
| IL-3                                                | 117 $\pm$ 24                   | 109 $\pm$ 11          | 119 $\pm$ 33        | 152 $\pm$ 17         | 128 $\pm$ 20          | 107 $\pm$ 29          | 123 $\pm$ 23          |
| IL-4                                                | 438 $\pm$ 113                  | 237 $\pm$ 84          | 270 $\pm$ 118       | 407 $\pm$ 102        | 320 $\pm$ 71          | 202 $\pm$ 94          | 178 $\pm$ 75          |
| IL-5                                                | 103 $\pm$ 59                   | 80 $\pm$ 45           | 54 $\pm$ 25         | 48 $\pm$ 36          | 15 $\pm$ 15           | 90 $\pm$ 53           | 75 $\pm$ 35           |
| IL-6                                                | 60 $\pm$ 20                    | 1260 $\pm$ 440        | 191 $\pm$ 81        | 715 $\pm$ 374        | 310 $\pm$ 92          | 818 $\pm$ 439         | 376 $\pm$ 107         |
| IL-10                                               | 1618 $\pm$<br>414              | 1018 $\pm$ 240        | 1025 $\pm$ 336      | 1275 204             | 974 $\pm$ 199         | 977 $\pm$ 246         | 908 $\pm$ 205         |
| IL-12(p40)                                          | 5708 $\pm$<br>976              | 3621 $\pm$ 725        | 2748 $\pm$ 478      | 5757 $\pm$ 1042      | 3143 $\pm$ 498        | 2277 $\pm$ 435        | 3236 $\pm$ 660        |
| IL-12(p70)                                          | 0                              | 28 $\pm$ 25           | 200 $\pm$ 121       | 208 $\pm$ 125        | 80 $\pm$ 80           | 321 $\pm$ 259         | 279 $\pm$ 212         |
| IL-13                                               | 1080 $\pm$<br>510              | 1311 $\pm$ 455        | 766 $\pm$ 253       | 693 $\pm$ 312        | 398 $\pm$ 191         | 1051 $\pm$ 352        | 1031 $\pm$ 210        |
| IL-17                                               | 89 $\pm$ 45                    | 513 $\pm$ 189         | 148 $\pm$ 86        | 367 $\pm$ 166        | 33 $\pm$ 33           | 491 $\pm$ 220         | 899 $\pm$ 324         |
| Eotaxin                                             | 320281 $\pm$<br>81142          | 172280 $\pm$<br>63089 | 201510 $\pm$ 95939  | 282858 $\pm$ 74456   | 215750 $\pm$<br>45334 | 124084 $\pm$<br>61550 | 113462 $\pm$<br>47191 |
| G-CSF                                               | 866 $\pm$ 402                  | 4088 $\pm$ 1911       | 853 $\pm$ 253       | 1936 $\pm$ 565       | 3712 $\pm$ 2321       | 1913 $\pm$ 1019       | 2080 $\pm$ 683        |

|                |                   |                  |                 |                  |                 |                  |                 |
|----------------|-------------------|------------------|-----------------|------------------|-----------------|------------------|-----------------|
| IFN- $\gamma$  | 350 $\pm$ 136     | 369 $\pm$ 134    | 353 $\pm$ 140   | 286 $\pm$ 89     | 260 $\pm$ 66    | 403 $\pm$ 125    | 492 $\pm$ 102   |
| KC             | 711 $\pm$ 99      | 11534 $\pm$ 1874 | 5129 $\pm$ 743  | 6273 $\pm$ 1390  | 5984 $\pm$ 1120 | 8793 $\pm$ 2885  | 7316 $\pm$ 1079 |
| MCP-1          | 4442 $\pm$<br>928 | 15740 $\pm$ 2758 | 7431 $\pm$ 1464 | 12331 $\pm$ 2543 | 8163 $\pm$ 1482 | 12229 $\pm$ 4254 | 8649 $\pm$ 1561 |
| MIP-1 $\alpha$ | 260 $\pm$ 134     | 4295 $\pm$ 417   | 2863 $\pm$ 578  | 4367 $\pm$ 1207  | 4729 $\pm$ 1570 | 3418 $\pm$ 927   | 4042 $\pm$ 799  |
| MIP-1 $\beta$  | 2772 $\pm$<br>472 | 1928 $\pm$ 232   | 1746 $\pm$ 288  | 1908 $\pm$ 188   | 1186 $\pm$ 326  | 1873 $\pm$ 470   | 1927 $\pm$ 332  |
| RANTES         | 2994 $\pm$<br>729 | 3132 $\pm$ 939   | 4155 $\pm$ 1587 | 3401 $\pm$ 668   | 3974 $\pm$ 1724 | 2481 $\pm$ 528   | 3991 $\pm$ 1978 |

<sup>a</sup> IL-2, IL-9, TNF- $\alpha$ , and GM-CSF were measured but were out of range for quantification.

<sup>b</sup> The number of mice used for each analysis is indicated in parentheses. A total of three DSS-treated control mice and two mice fed BL580 in milk were excluded from cytokine/chemokine quantification because of sacrifice before the end of the study.

<sup>c</sup> The avg  $\pm$  ste of cytokine quantities is shown.

**Table S2. Correlation analysis between phylotypes, DAI, and % body weight loss.**

| Family                                  | DAI                     |         | % Body weight lost      |         |
|-----------------------------------------|-------------------------|---------|-------------------------|---------|
|                                         | Correlation coefficient | P value | Correlation coefficient | P value |
| Unclassified <i>Bacilli</i>             | 0.47                    | 0.00    | 0.39                    | 0.00    |
| <i>Enterobacteriaceae</i>               | 0.45                    | 0.00    | 0.34                    | 0.01    |
| Unclassified <i>Gammaproteobacteria</i> | 0.41                    | 0.00    | 0.32                    | 0.01    |
| <i>Porphyromonadaceae</i>               | 0.36                    | 0.00    | 0.36                    | 0.00    |
| <i>Enterococcaceae</i>                  | 0.27                    | 0.03    | 0.24                    | 0.05    |
| <i>Alcaligenaceae</i>                   | 0.25                    | 0.04    | 0.11                    | 0.39    |
| Unclassified <i>Bacteria</i>            | -0.26                   | 0.04    | -0.18                   | 0.15    |
| <i>Bifidobacteriaceae</i>               | -0.27                   | 0.03    | -0.25                   | 0.04    |
| <i>Rikenellaceae</i>                    | -0.27                   | 0.03    | -0.25                   | 0.05    |
| Unclassified <i>Bacteroidales</i>       | -0.28                   | 0.02    | -0.24                   | 0.05    |
| Undefined RF32                          | -0.29                   | 0.02    | -0.16                   | 0.21    |
| <i>Clostridiaceae</i>                   | -0.16                   | 0.19    | -0.25                   | 0.05    |
| <i>Lachnospiraceae</i>                  | -0.31                   | 0.01    | -0.31                   | 0.01    |
| [ <i>Odoribacteraceae</i> ]             | -0.32                   | 0.01    | -0.15                   | 0.25    |
| Undefined <i>Clostridiales</i>          | -0.34                   | 0.01    | -0.32                   | 0.01    |
| S24-7                                   | -0.37                   | 0.00    | -0.30                   | 0.02    |
| <i>Peptococcaceae</i>                   | -0.43                   | 0.00    | -0.34                   | 0.01    |
| Unclassified <i>Clostridiales</i>       | -0.43                   | 0.00    | -0.33                   | 0.01    |
| <i>Desulfovibrionaceae</i>              | -0.45                   | 0.00    | -0.36                   | 0.00    |
| <i>Ruminococcaceae</i>                  | -0.46                   | 0.00    | -0.40                   | 0.00    |

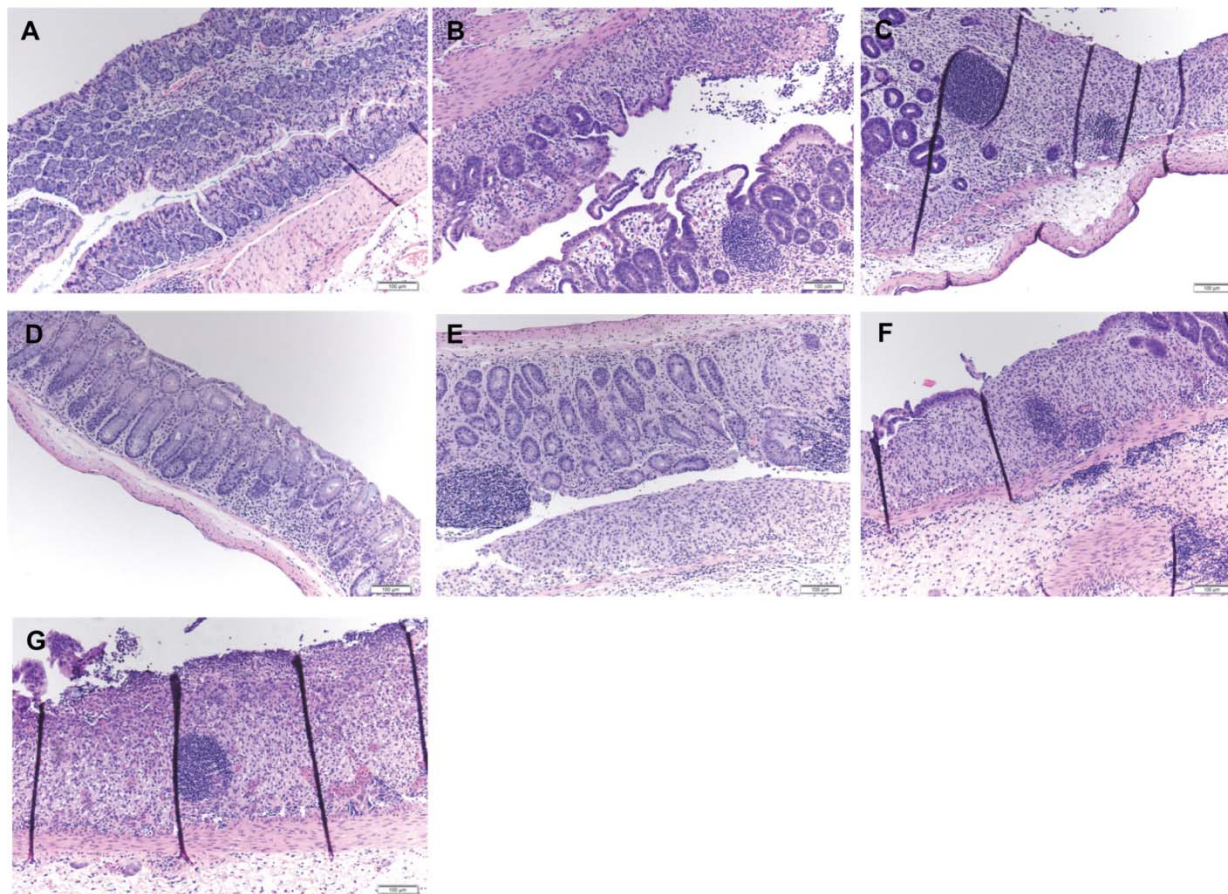

**Figure S1. Histology of the distal colon.** Mice were fed (A) PBS (sham-treated), or 2 to 3% DSS in their drinking water and oral supplements of (B) PBS, (C) *L. casei* BL23 in PBS, (D) BL23+milk, (E) BL580+milk, (F) BL180+milk, or (G) acidified milk. (A) has an intact mucosa and no significant inflammatory infiltrate (Score = 0); (D) has an intact mucosa with inflammation in mucosa and submucosa (Score = 4); (E) has extensive ulceration with inflammation in mucosa and submucosa, but not transmural (Score = 7); (B, C, F, and G) have extensive ulceration and transmural inflammation (Score = 9); Hematoxylin and Eosin, Bar = 100µM.

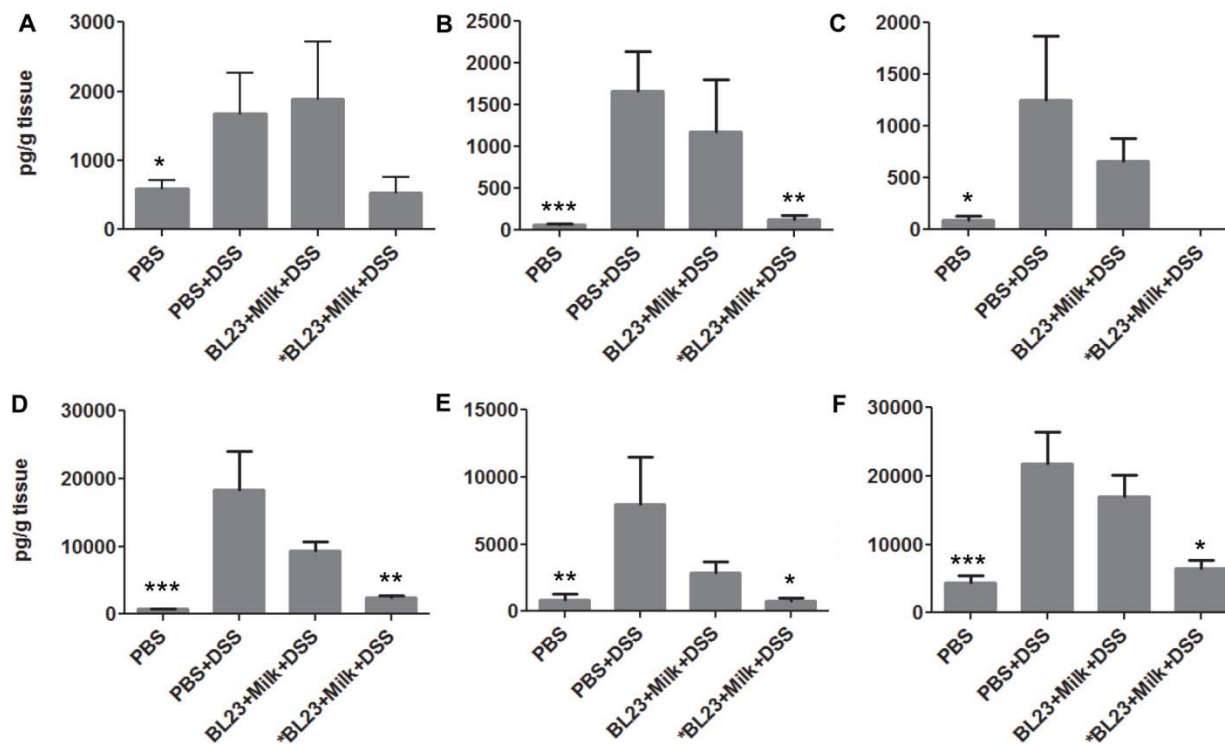

**Figure S2. Colonic cytokine levels differed between mice fed *L. casei* BL23 in milk.** The quantities of (A) IL-1 $\alpha$ , (B) IL-6, (C) IL-17, (D) Keratinocyte-derived chemokine KC, (E) G-CSF, and (F) MCP-1 were measured. The average  $\pm$  ste for twelve (PBS, healthy sham), five (BL23+milk+DSS), or four (\*BL23+milk+DSS) mice fed *L. casei* in milk individual mice is shown. \*BL23+milk+DSS indicates the four mice clustered with PBS (no DSS) fed mice in the result of PCA in **Figure 4**. \*:  $p < 0.05$ , \*\*:  $p < 0.01$ , \*\*\*:  $p < 0.001$  according to the Mann-Whitney U Test compared to DSS control group.

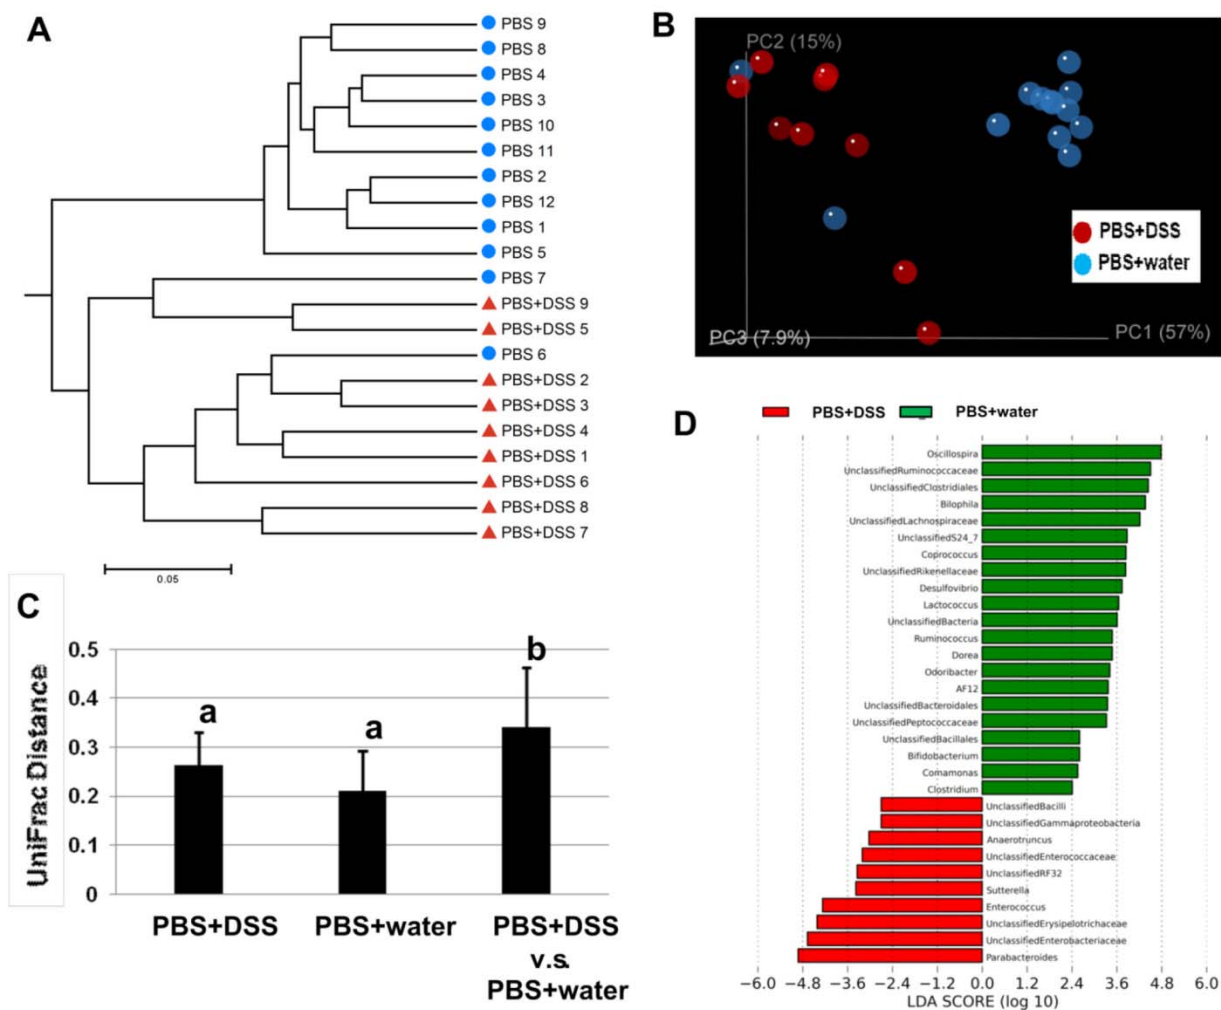

**Figure S3. Differences in gut microbiota structure between DSS-treated mice and the healthy controls.** (A) Cluster analysis based on the UniFrac distance of the microbiota in the ceca of DSS and healthy control mice. (B) Weighted UniFrac PCoA analysis of the gut microbiota structure. (C) UniFrac distance within and between groups. Statistical significance according to the Bonferroni-corrected P value  $<0.01$  of the Student *t* test is indicated. (D) LDA score histogram of key phylotypes differently abundant in DSS- and healthy control mice.

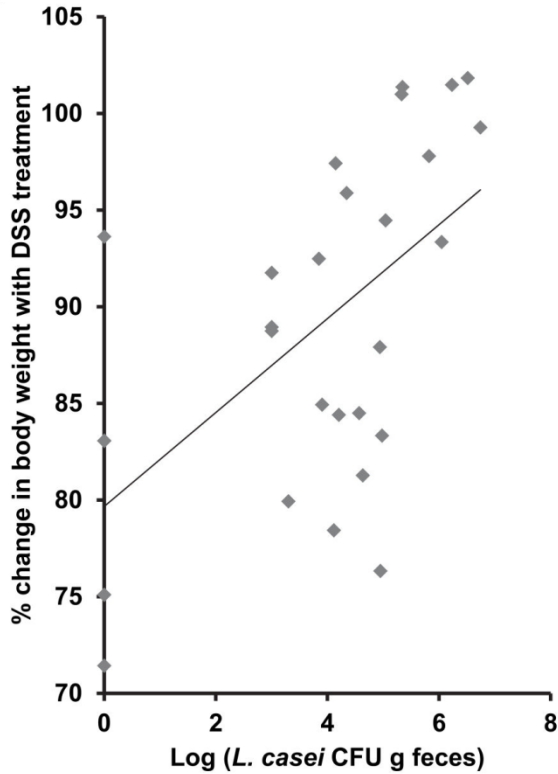

**Figure S4. Correlation between *L. casei* cell viability and mouse body weight.** The % change in mouse body weight at the time of necropsy was compared to body weight on prior to DSS initiation. All *L. casei* BL23, BL580, and BL180 fed mice were included except for one mouse fed *L. casei* BL23 in milk, three mice fed *L. casei* BL23 in PBS, and two mice fed *L. casei* BL580 in milk because of diarrhea or early termination point ( $R^2=0.33$ ).
